# Supplementary material
Source: publisher site journal article supplement (https://www.spandidos-publications.com/1104/downloadSupplementary)
Supplement: Supplementary file 1 [file downloadSupplementary]

## Sheet: FLNB
Table SI. Primers of reverse transcription-quantitative PCR for assessing FLNB knockdown efficiency by comparing shFLNB groups and GAPDH as a control.
Gene	Primer
GAPDH-F	5'-GGTCGGAGTCAACGGATTTG-3'
GAPDH-R	5'-GGAAGATGGTGATGGGATTTC-3'
FLNB-F	5'-ACACCAAAGCTGCAGGAAGT-3'
FLNB-R	5'-GGCTCTTTGGAATGTGGTGT-3'
F, forward; R, reverse; FLNB, filamin B.

## Sheet: DEGs
Primers of reverse transcription-quantitative PCR for validating differentially expressed genes by short hairpin FLNB.
Gene	Primer, 5'-3'
ATP7A-F	GTGAAGTCGTGCTGAAGATGA
ATP7A-R	TTAATTCGCTGAACACCTTGC
MMP13-F	ACATCGTCATCAGGAAGCATAA
MMP13-R	ACTCCTTAGGTCTTGACCACTC
COL2A1-F	TGCTGCTCCACCAGTTCTT
COL2A1-R	CACCTTGGACGCCATGAAG
GHRL-F	GGATGACTGGCGTTTGTTCTAA
GHRL-R	ATCTGACCTCCACTGTTGACTT
BMP7-F	TGACCACCCAGTGGTTGCT
BMP7-R	GGAATCGGATCTCTTCCTGCTC
IL23A-F	GCAGAGATTCCACCAGGACT
IL23A-R	CAGCAGCAACAGCAGCATT
NAIP-F	GAGAAGCCTCTGGAATGAAGTC
NAIP-R	TGGATGAAACGGGTTTAACACA
MALAT1-F	CAATGAAGAGGCAATGTCCATC
MALAT1-R	AACGAAGAGATACCTGTCTGAG
SLC25A36-F	GTGGTACAGTGGGAGCTATTCT
SLC25A36-R	GGAGACACTACTCGGTTGACA
F, forward; R, reverse; FLNB, filamin B.

## Sheet: ASs
Primers of reverse transcription-quantiative PCR for validating regulated alternative splicing events by short hairpin FLNB.
Gene	Primer, 5'-3'
HMOX2-M/A-R	TCATTTGGTTCTCCTTTTCTAGG
HMOX2-M-F	CTGCGGCAGGACCAGAGGA
HMOX2-A-F	GATTACAGGACCAGAGGA
VDR-M/A-F	TCACAGGTCATAGCATTGAAGT
VDR-M-R	TTCATTTCAGGGATGGAGGC
VDR-A-R	GCTCCTTCAGGGATGGAGGC
PTK2-M/A-F	CCCTTCCGTTATTCTTGAGGAG
PTK2-M-R	CGCGGTCCGAGCAGAACTGG
PTK2-A-R	GCTTAAGGAGGCAGAACTGG
PACS2-M/A-R	CTCGTCGGACACTTTGAACC
PACS2-M-F	GAGATCGATTCAACAGAACT
PACS2-A-F	CATGACCAGGCAACAGAACT
ATXN1-M/A-R	GAGCATCGTGCATCAAGTC
ATXN1-M-F	CTCCAGTATGCTGACATGTG
ATXN1-A-F	GTTCTGTGACCTGACATGTG
MAP2K7-M/A-R	TGTGAACAGGGTTGACGGGAG
MAP2K7-M-F	CCAGGCCCACCCTGCAGCT
MAP2K7-A-F	AACGAGCAGCCCTGCAGCT
MALAT1-M/A-F	TGAGAGAAAGGACTACAGA
MALAT1-M-R	AAAAGAGAAACCTACAACTTT
MALAT1-A-R	TATTTTAATCACCTACAACTTT
F, forward; R, reverse; FLNB, filamin B.
